# Supplementary material for: An Integrative Approach to Analyze Seed Germination in Brassica napus
Source: PubMed Central journal article supplement (PMC6824160; doi:10.3389/fpls.2019.01342), 2019-10-25

# Cluster 8

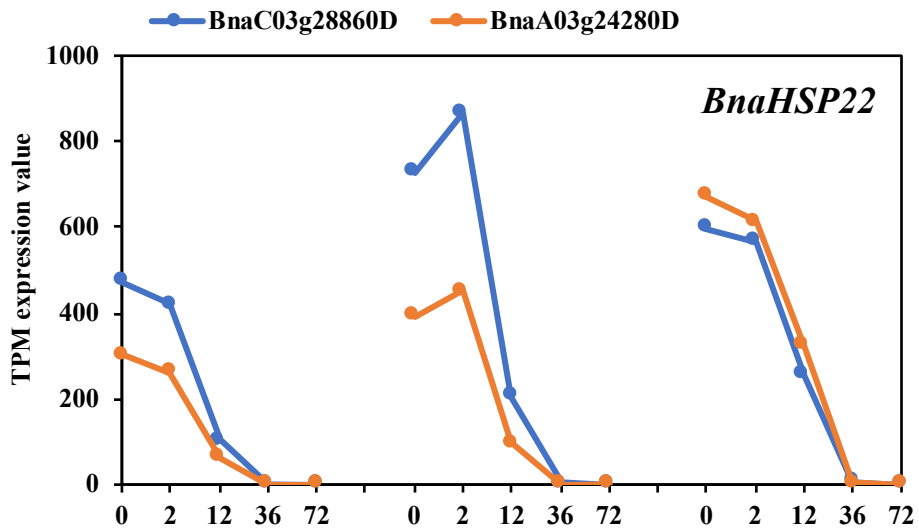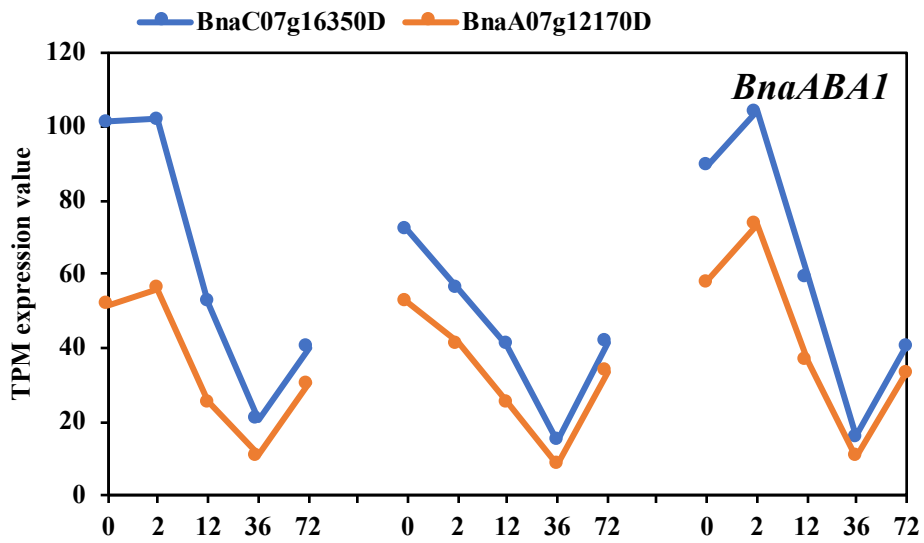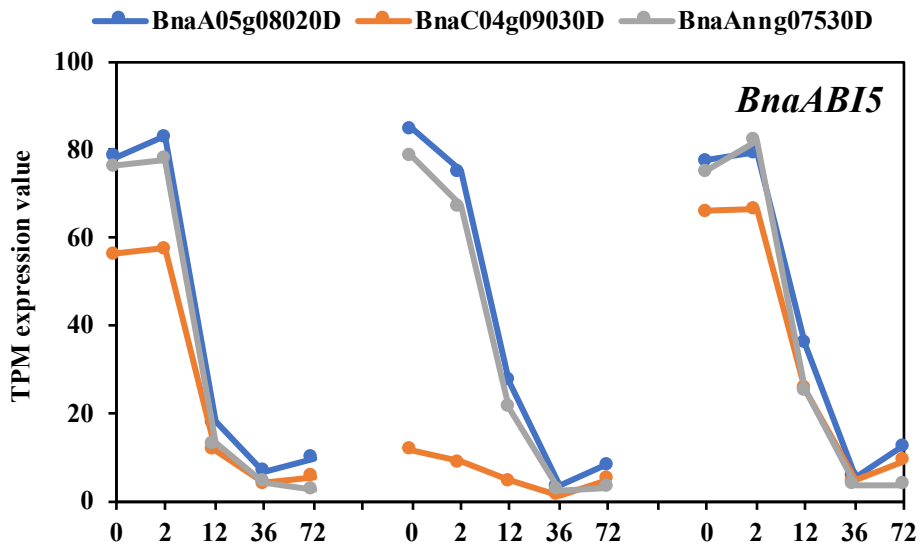

## Cluster 9

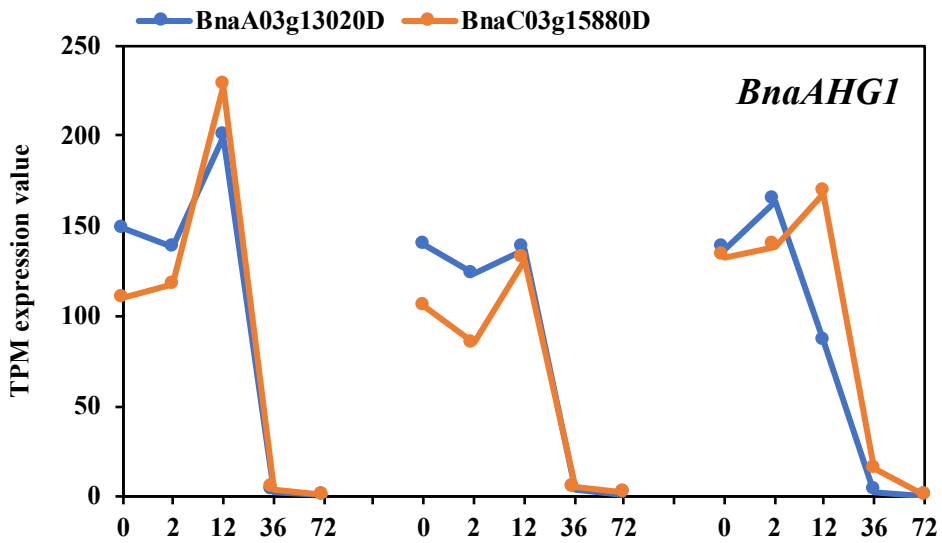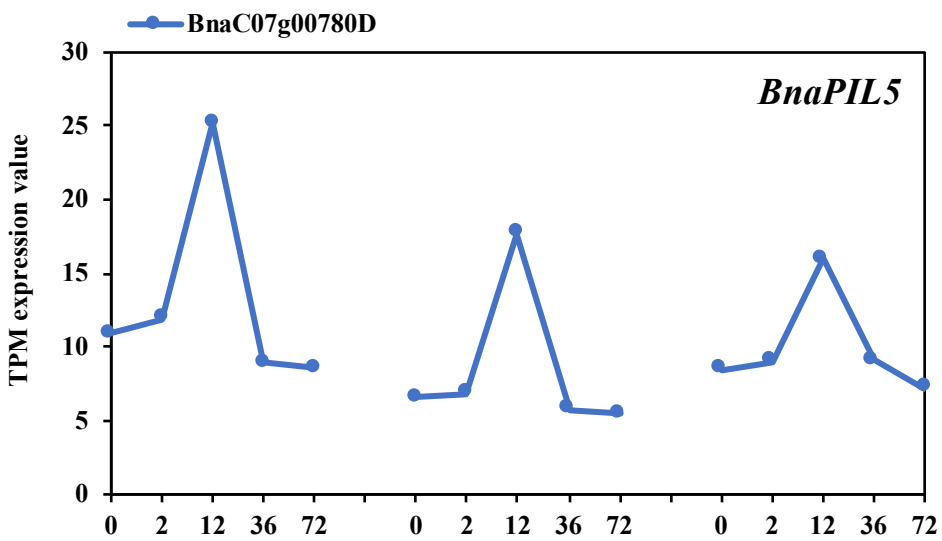

## Cluster 4

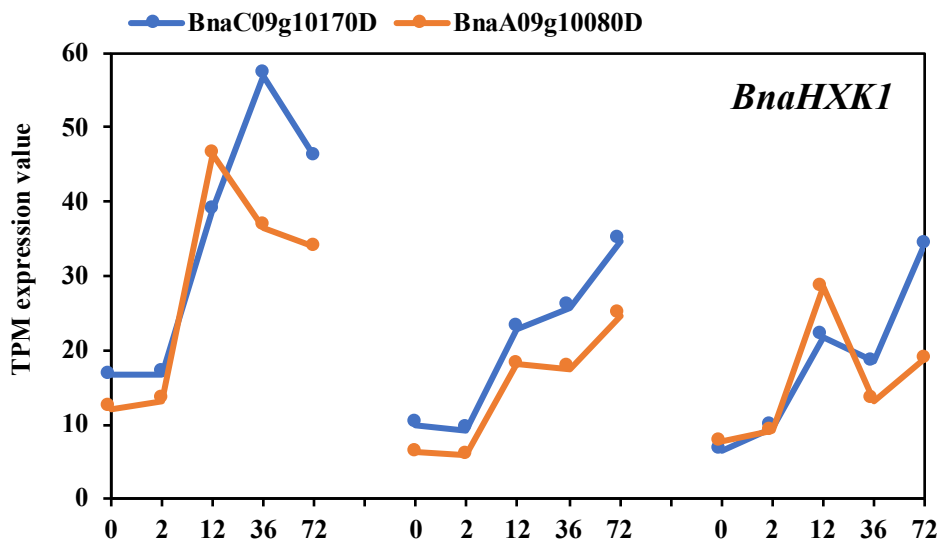

# Cluster 3

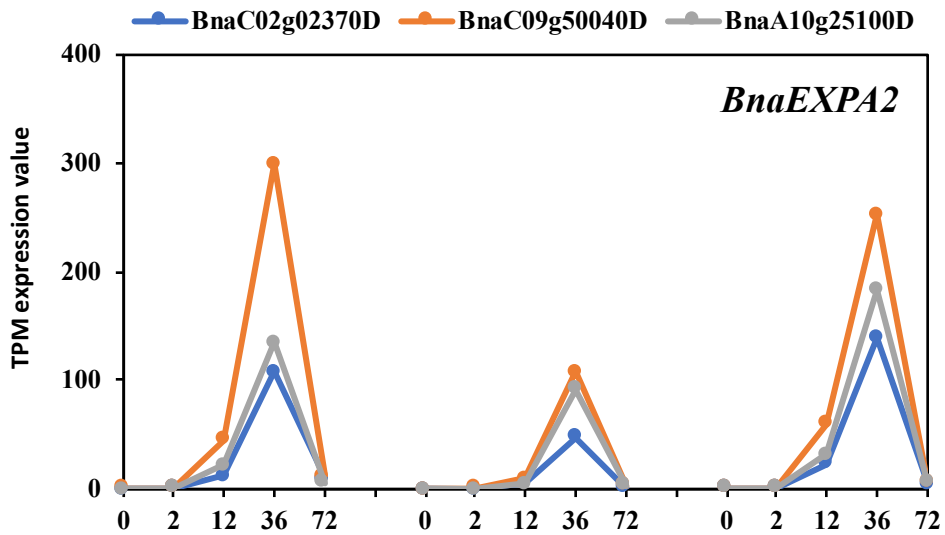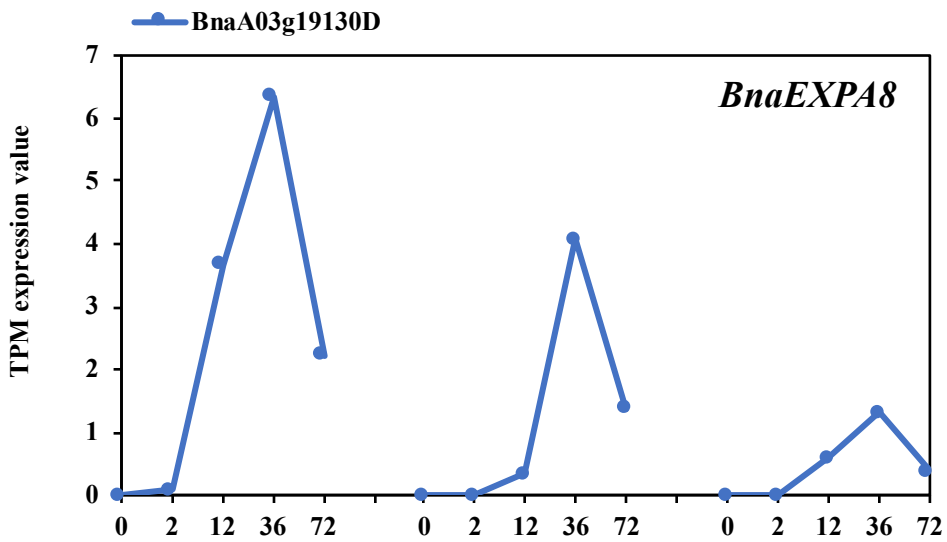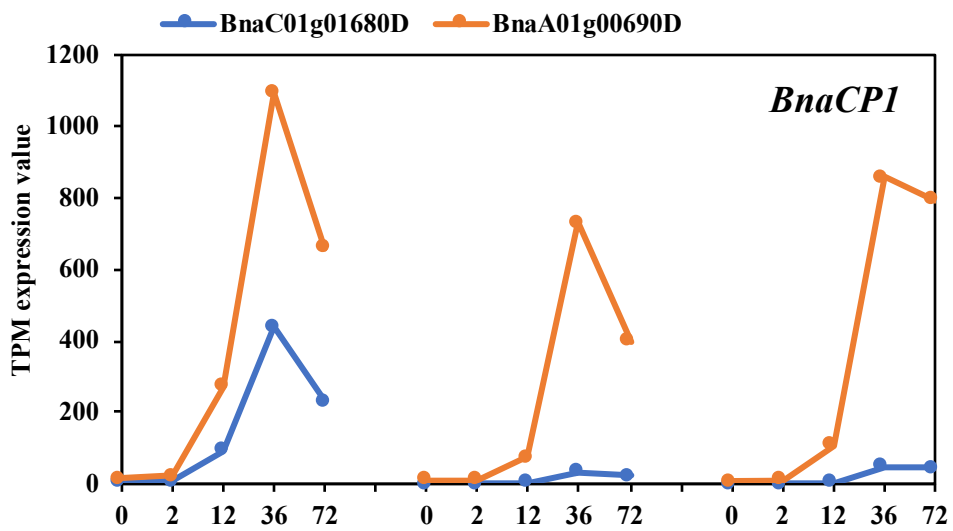

# Cluster 5

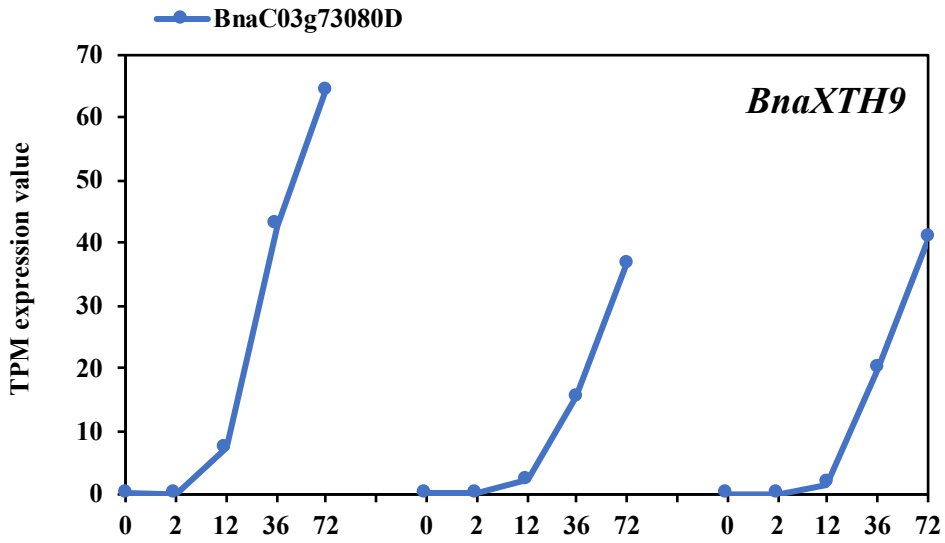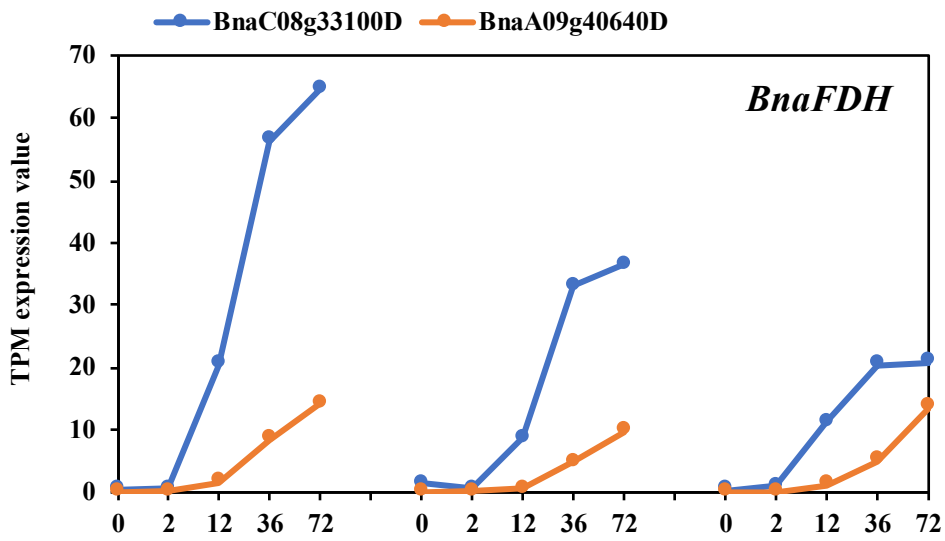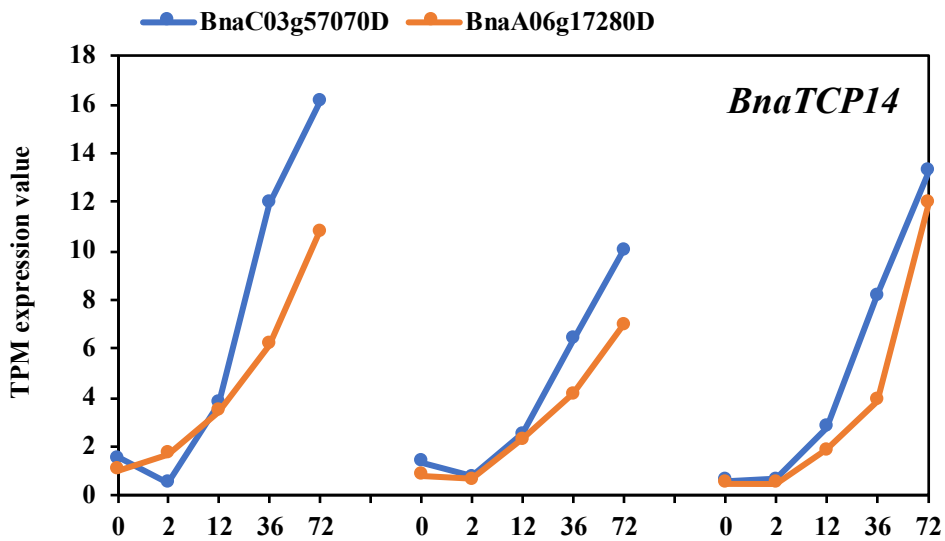

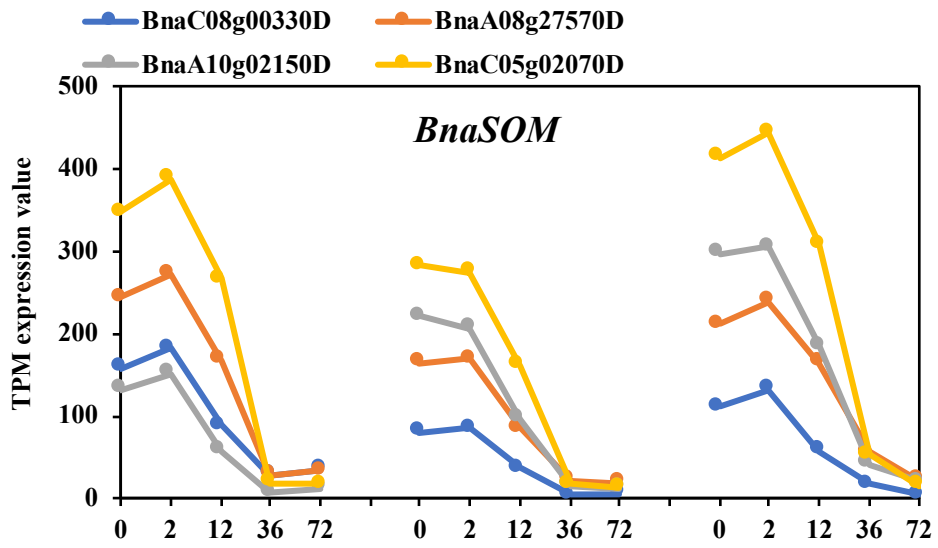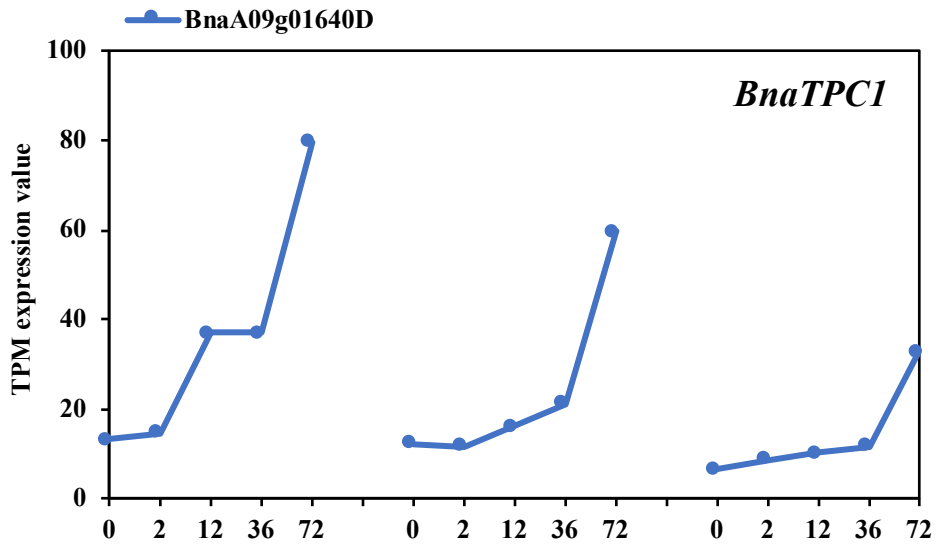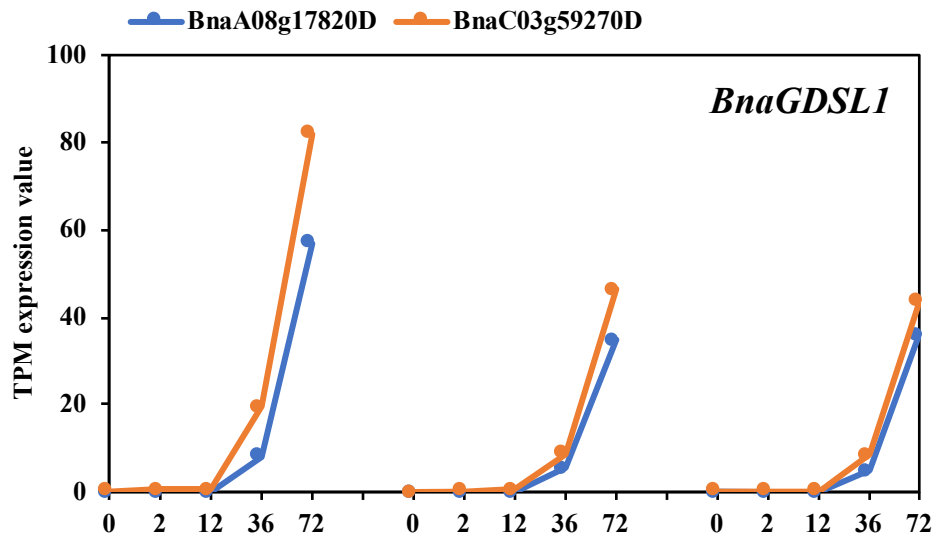

Supplement: Image_3.pdf [file Image_3.pdf]
